# Supplementary material
Source: publisher site journal article supplement (https://www.dovepress.com/article/431725)

**Table S1 All primer sequences used for qRT-PCR**

| Gene name      | Forward primer          | Reverse primer          |
|----------------|-------------------------|-------------------------|
| miR-130b-5p    | GGCACTCTTCCCTGTTGC      | ACTGCAGGGTCCGAGGTATT    |
| U6             | CTCGCTTCGGCAGCACATATACT | ACGCTTCACGAATTTGCGTGTC  |
| E2F1           | GAGAAGTCACGCTATGAAACCTC | CCCAGTTCAGGTCAACGACAC   |
| TGFBR3         | GGTGTGAACTGTCACCGATCA   | GTTTAGGATGTGAACCTCCCTTG |
| $\beta$ -actin | GGCTGTATTCCCCTCCATCG    | CCAGTTGGTAACAATGCCATGT  |

**Table S2. Antibodies employed in the western blotting, IHC and IF assay**

| <b>Antibody</b>                      | <b>Species</b> | <b>Company</b> |
|--------------------------------------|----------------|----------------|
| <b>anti-CD31</b>                     | Rabbit         | Abcam          |
| <b>anti-CD9</b>                      | Rabbit         | Proteintech    |
| <b>anti-CD63</b>                     | Rabbit         | Signalway      |
| <b>anti-COLI</b>                     | Rabbit         | Proteintech    |
| <b>anti-GAPDH</b>                    | Mouse          | Proteintech    |
| <b>anti-HSP70</b>                    | Rabbit         | Proteintech    |
| <b>anti-MMP1</b>                     | Rabbit         | Proteintech    |
| <b>anti-p-SMAD2</b>                  | Rabbit         | Abclonal       |
| <b>anti-p-SMAD3</b>                  | Rabbit         | Abclonal       |
| <b>anti-SMAD2</b>                    | Rabbit         | Abclonal       |
| <b>anti-SMAD3</b>                    | Rabbit         | Abclonal       |
| <b>anti-TGFBR3</b>                   | Rabbit         | Abclonal       |
| <b>anti-TGF-<math>\beta</math>1</b>  | Rabbit         | Bioss          |
| <b>anti-<math>\alpha</math>-SMA</b>  | Mouse          | Boster Bio     |
| <b>anti-<math>\beta</math>-actin</b> | Mouse          | Proteintech    |
| <b>goat anti-mouse IgG</b>           | Goat           | Proteintech    |
| <b>goat anti-rabbit IgG</b>          | Goat           | Proteintech    |

**Figure S1. The PPI network maps of differentially expressed miRNAs between ADSC<sup>WT</sup> and ADSC<sup>E2F1<sup>-/-</sup></sup> and their target proteins.**

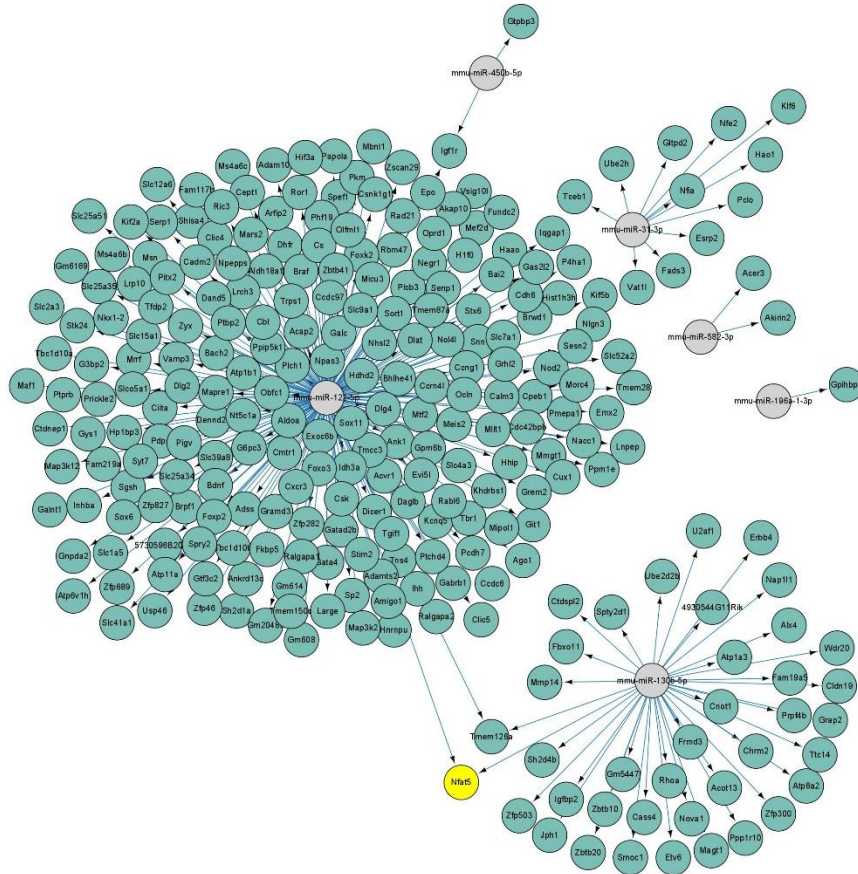

Supplement: Supplementary file 1 [file get_supplementary_file.php]
